# Supplementary material
Source: publisher figshare collection journal article supplement (https://acs.figshare.com/ndownloader/files/3978004)
Supplement: Supplementary file 1 [file 3978004]

# **Supporting Information for “Molecular Simulations Indicate Marked Differences in Structure of Amylin Mutants, Correlated with known Aggregation Propensity”**

Cayla Miller, Gül H. Zerze, and Jeetain Mittal\*

*Department of Chemical Engineering, Lehigh University, Bethlehem, PA 18034, USA*

E-mail: jeetain@lehigh.edu

---

\*To whom correspondence should be addressed

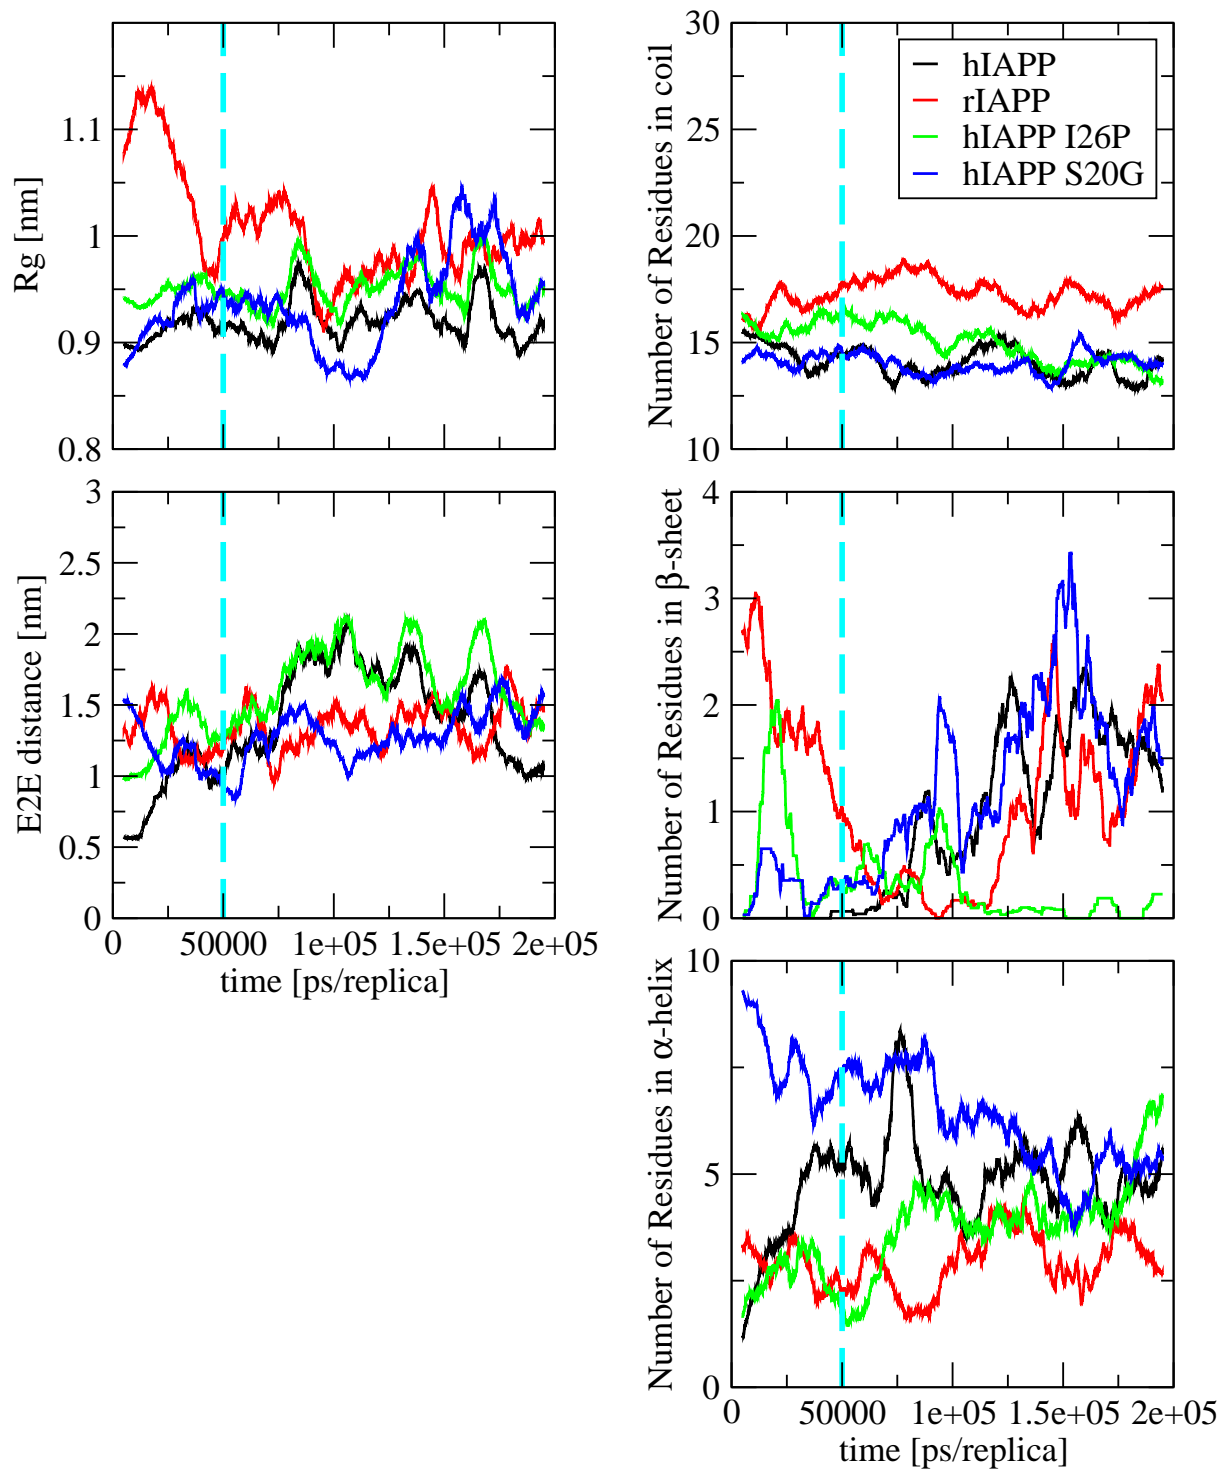

Figure S1: Equilibration IAPP trajectories at 300 K measured by (Left): Distances:  $R_g$  (Top), End-to-end distance (Middle), and (Rigth): Secondary structure formation: Coil (Top),  $\beta$ -sheet (Middle),  $\alpha$ -helix (Bottom), illustrated by moving averages of 10 ns/replica. Data up to dashed cyan line has discarded for equilibration.

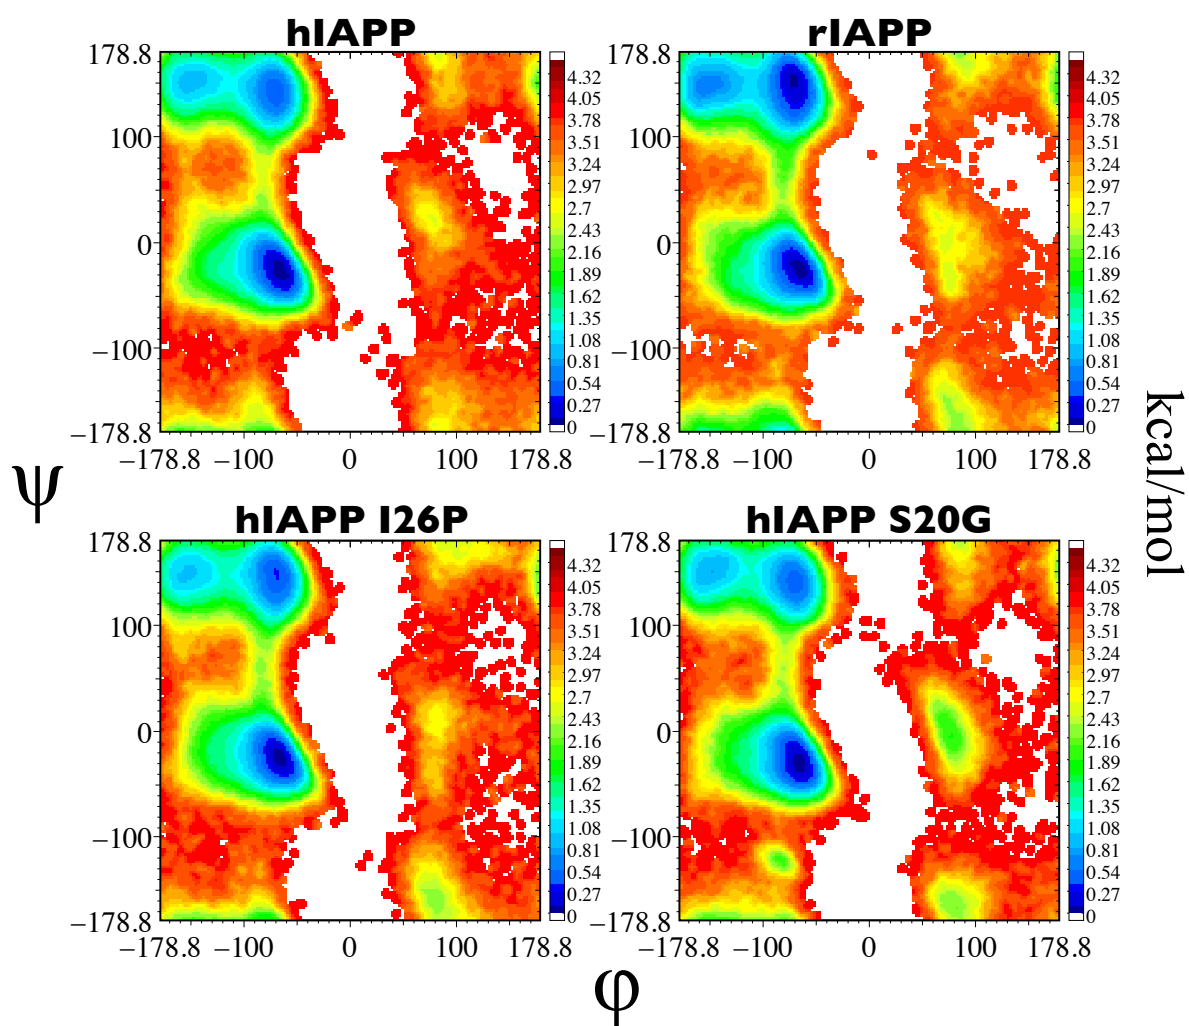

Figure S2: Ramachandran maps of IAPP equilibrated trajectories, free-energy contoured in kcal/mol.

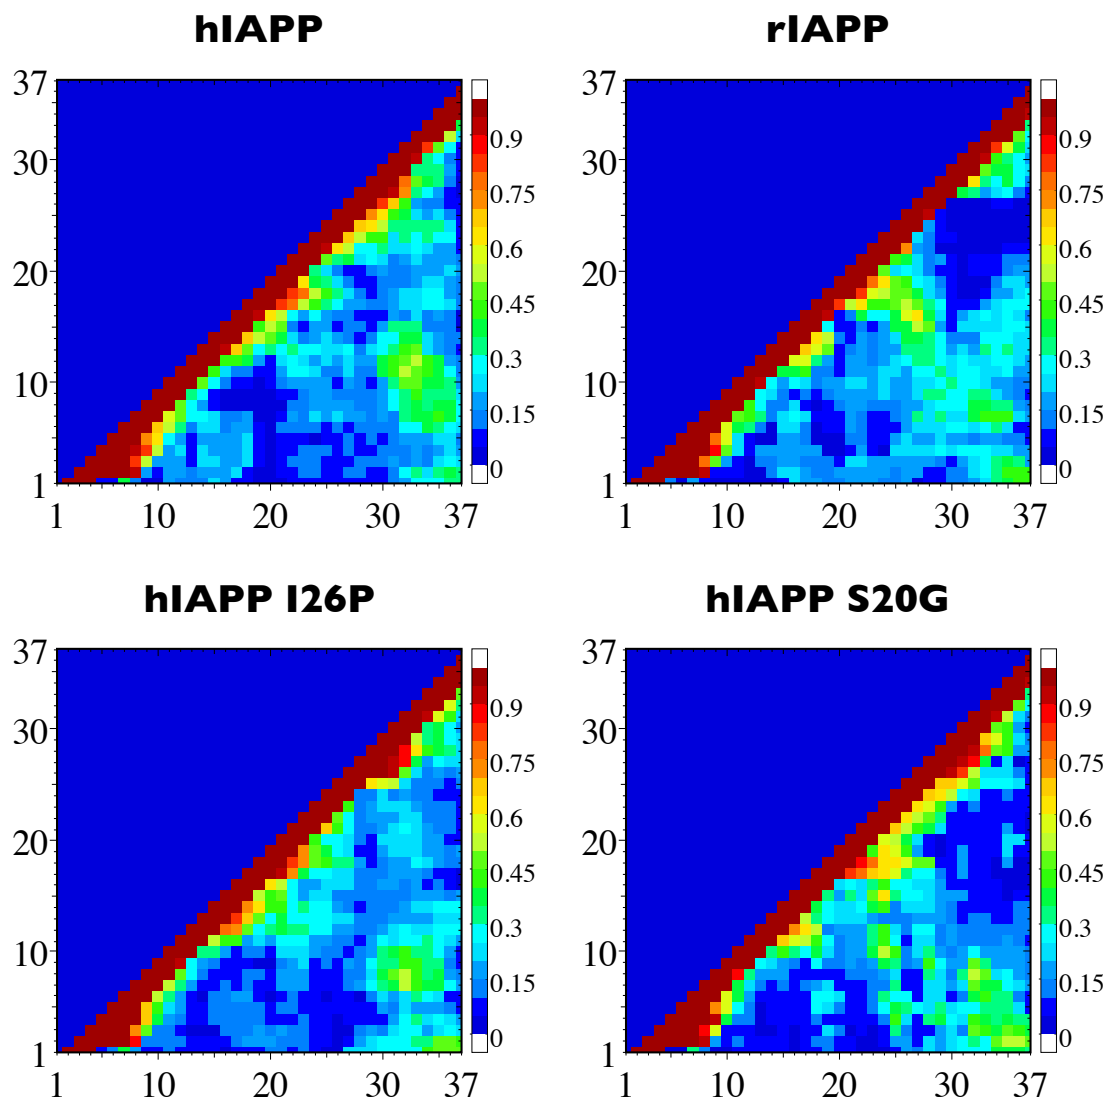

Figure S3: Contact maps of equilibrated IAPP trajectories calculated based on backbone where cutoff distance is 0.8 nm.
